# Supplementary material
Source: publisher figshare collection journal article supplement (https://acs.figshare.com/ndownloader/files/4679320)
Supplement: Supplementary file 1 [file 4679320]

**Supporting Information**

Substituent effects on the energetic and aromaticity of aminomethylbenzoic acids

**Carlos F. R. A. C. Lima, Luís M. N. B. F. Santos**

Centro de Investigação em Química, Departamento de Química, Faculdade de Ciências, Universidade do Porto, R Campo Alegre 687, 4169-007 Porto, Portugal

E-mail address: lbsantos@fc.up.pt

**Lígia R. Gomes**

CIAGEB, Faculdade de Ciências da Saúde da UFP, Universidade Fernando Pessoa, R Carlos da Maia 296, 4200-150 Porto, Portugal

**Experimental Results**

Table S1 – Calorimetric results for the calibration experiments with benzoic acid.

| **Benzoic acid (Calorimetric Standard NIST 39j)** | | | | | | | | | | | |
| --- | --- | --- | --- | --- | --- | --- | --- | --- | --- | --- | --- |
|  | **1** | **2** | **3** | **4** | **5** | **6** | **7** | **8** | **9** | **10** | **11** |
| *m*(cpd.)./ g | 1.13642 | 0.80626 | 0.70474 | 0.66795 | 0.77120 | 0.80363 | 0.67539 | 0.75132 | 0.78391 | 0.59341 | 0.74475 |
| *m’*(fuse) / g | 0.00288 | 0.00228 | 0.00285 | 0.00344 | 0.00385 | 0.00219 | 0.00224 | 0.00220 | 0.00242 | 0.00284 | 0.00275 |
| *T*i / ºC | 25.0000 | 25.0012 | 25.0005 | 25.0007 | 25.0006 | 25.0013 | 25.0004 | 25.0020 | 25.0011 | 25.0022 | 25.0021 |
| *T*f / ºC | 26.9869 | 26.4474 | 26.2796 | 26.2135 | 26.3897 | 26.4431 | 26.2333 | 26.3583 | 26.2958 | 26.0988 | 26.3431 |
| *T*ad / K | 1.93365 | 1.37181 | 1.20071 | 1.13811 | 1.31478 | 1.36880 | 1.15052 | 1.27954 | 1.33435 | 1.01123 | 1.26752 |
| **i (cont.) / JK-1 | 14.36 | 13.96 | 13.84 | 13.79 | 13.92 | 13.96 | 13.80 | 13.90 | 13.94 | 13.70 | 13.89 |
| **f (cont.) / JK-1 | 15.59 | 14.83 | 14.60 | 14.52 | 14.75 | 14.83 | 14.53 | 14.71 | 14.78 | 14.35 | 14.69 |
| *m (*H2O) / g | -1.2 | 0.4 | -0.7 | 0.3 | -1.5 | -3.1 | -2.9 | -3.5 | -0.2 | -1.9 | 0.6 |
| *-m*(cpd.)(c*U*) / J | 30041.80 | 21312.77 | 18628.96 | 17656.41 | 20385.97 | 21243.19 | 17852.99 | 19860.27 | 20721.98 | 15685.69 | 19686.71 |
| *m’*·c*u*o(fuse) / J | 46.77 | 37.03 | 46.28 | 55.87 | 62.52 | 35.57 | 36.38 | 35.73 | 39.30 | 46.12 | 44.66 |
| -*U*(HNO3) / J | 11.74 | 8.15 | 7.23 | 5.47 | 8.09 | 8.15 | 7.44 | 7.52 | 8.35 | 5.71 | 7.69 |
| -*U*(ign) / J | 1.20 | 1.21 | 1.18 | 1.19 | 1.19 | 1.16 | 1.13 | 1.17 | 1.14 | 1.06 | 1.05 |
| -*U*(carbon) / J | 0.00 | 0.00 | 0.00 | 0.00 | 0.00 | 0.00 | 0.00 | 0.00 | 0.00 | 0.00 | 0.00 |
| **(calor) / JK-1 | 15556.63 | 15553.55 | 15548.85 | 15552.97 | 15551.35 | 15550.50 | 15549.81 | 15556.06 | 15552.26 | 15557.40 | 15556.60 |
| ****(calor) / J·K-1 = 15553.27 ± 0.91** | | | | | | | | | | | |

**Table S2 – Calorimetric results for 2-amino-3-methylbenzoic acid.**

| **2-amino-3-methylbenzoic acid** | | | | | | | |
| --- | --- | --- | --- | --- | --- | --- | --- |
|  | **1** | **2** | **3** | **4** | **5** | **6** | **7** |
| *m*(cpd.)./ g | 0.55130 | 0.53029 | 0.54810 | 0.49973 | 0.49432 | 0.52525 | 0.54655 |
| *m’*(fuse) / g | 0.00290 | 0.00248 | 0.00238 | 0.00272 | 0.00233 | 0.00228 | 0.00259 |
| *T*i / ºC | 25.0008 | 25.0011 | 25.0372 | 25.0078 | 25.0004 | 25.0011 | 25.0013 |
| *T*f / ºC | 26.0244 | 25.9920 | 26.0555 | 25.9470 | 25.9288 | 25.9856 | 26.0231 |
| *T*ad / K | 0.93944 | 0.90345 | 0.93337 | 0.85151 | 0.84136 | 0.89463 | 0.93124 |
| **i (cont.) / JK-1 | 15.09 | 15.03 | 15.06 | 15.02 | 15.02 | 15.06 | 15.08 |
| **f (cont.) / JK-1 | 15.57 | 15.53 | 15.57 | 15.49 | 15.47 | 15.53 | 15.61 |
| *m (*H2O) / g | -0.9 | -2.4 | -0.5 | -2.0 | 0.4 | -0.6 | -2.3 |
| -*U(IBP)* / J | 14622.45 | 14056.58 | 14529.63 | 13249.77 | 13100.37 | 13926.10 | 14489.42 |
| *m’*·c*u*o(fuse) / J | 47.10 | 40.28 | 38.65 | 44.17 | 37.84 | 37.03 | 42.06 |
| -*U*(HNO3) / J | 28.24 | 24.06 | 24.42 | 22.98 | 22.92 | 25.31 | 23.40 |
| -*U*(ign) / J | 1.20 | 1.20 | 1.20 | 1.21 | 1.20 | 1.20 | 1.20 |
| -*U*(carbon) / J | 0.00 | 0.00 | 0.00 | 0.00 | 0.00 | 0.00 | 0.00 |
| *U∑ / J* | 10.02 | 9.59 | 9.94 | 9.03 | 8.92 | 9.51 | 9.94 |
| *Δcu0* (cpd.) */ J·g-1* | -26366.74 | -26365.57 | -26373.46 | -26359.00 | -26358.61 | -26374.29 | -26370.36 |
| **<Δc*u*0> / J·g-1 = -26366.9 ± 2.4** | | | | | | | |

**Table S3 – Calorimetric results for 2-amino-5-methylbenzoic acid.**

| **2-amino-5-methylbenzoic acid** | | | | | | | | |
| --- | --- | --- | --- | --- | --- | --- | --- | --- |
|  | **1** | **2** | **3** | **4** | **5** | **6** | **7** | **8** |
| *m*(cpd.)./ g | 0.54898 | 0.43564 | 0.49714 | 0.40011 | 0.42098 | 0.44374 | 0.48298 | 0.54996 |
| *m’*(fuse) / g | 0.00250 | 0.00268 | 0.00282 | 0.00259 | 0.00369 | 0.00255 | 0.00261 | 0.00263 |
| *T*i / ºC | 25.0008 | 25.0007 | 25.0003 | 25.0006 | 25.0010 | 25.0005 | 25.0011 | 25.0010 |
| *T*f / ºC | 26.0043 | 25.8174 | 25.9348 | 25.7795 | 25.8095 | 25.8456 | 25.9125 | 26.0237 |
| *T*ad / K | 0.93538 | 0.74276 | 0.84703 | 0.68183 | 0.71918 | 0.75559 | 0.82293 | 0.93715 |
| **i (cont.) / JK-1 | 15.09 | 14.94 | 15.02 | 14.90 | 14.92 | 14.95 | 15.00 | 15.09 |
| **f (cont.) / JK-1 | 15.57 | 15.33 | 15.48 | 15.27 | 15.31 | 15.37 | 15.43 | 15.58 |
| *m (*H2O) / g | -0.6 | 0.9 | 0.1 | 1.0 | -1.3 | 4.3 | -0.5 | 0.0 |
| -*U(IBP)* / J | 14560.38 | 11566.55 | 13187.52 | 10617.87 | 11192.73 | 11777.10 | 12810.26 | 14590.38 |
| *m’*·c*u*o(fuse) / J | 40.60 | 43.52 | 45.80 | 42.06 | 59.93 | 41.41 | 42.39 | 42.71 |
| -*U*(HNO3) / J | 27.46 | 21.73 | 23.34 | 18.09 | 19.52 | 19.88 | 23.70 | 26.98 |
| -*U*(ign) / J | 1.19 | 1.19 | 1.20 | 1.20 | 1.20 | 1.19 | 1.19 | 1.20 |
| -*U*(carbon) / J | 0.00 | 0.00 | 0.00 | 0.00 | 0.00 | 0.00 | 0.00 | 0.00 |
| *U∑ / J* | 9.97 | 7.80 | 8.98 | 7.13 | 7.54 | 7.95 | 8.70 | 10.00 |
| *Δcu0* (cpd.) */ J·g-1* | -26378.51 | -26380.07 | -26367.32 | -26366.37 | -26377.65 | -26381.83 | -26366.19 | -26383.01 |
| **<Δc*u*0> / J·g-1 = -26375.1 ± 2.6** | | | | | | | | |

**Table S4 – Calorimetric results for 2-amino-6-methylbenzoic acid.**

| **2-amino-6-methylbenzoic acid** | | | | | | |
| --- | --- | --- | --- | --- | --- | --- |
|  | **1** | **2** | **3** | **4** | **5** | **6** |
| *m*(cpd.)./ g | 0.49438 | 0.49987 | 0.51258 | 0.47646 | 0.43583 | 0.45215 |
| *m’*(fuse) / g | 0.00256 | 0.00307 | 0.00243 | 0.00308 | 0.00264 | 0.00245 |
| *T*i / ºC | 25.0014 | 25.0021 | 25.0009 | 25.0012 | 25.0010 | 25.0048 |
| *T*f / ºC | 25.9355 | 25.9477 | 25.9647 | 25.9066 | 25.8387 | 25.8688 |
| *T*ad / K | 0.84570 | 0.85508 | 0.87615 | 0.81577 | 0.74640 | 0.77421 |
| **i (cont.) / JK-1 | 15.02 | 15.02 | 15.04 | 14.99 | 14.94 | 14.96 |
| **f (cont.) / JK-1 | 15.47 | 15.49 | 15.51 | 15.44 | 15.34 | 15.37 |
| *m (*H2O) / g | -3.1 | -1.5 | -1.1 | -2.7 | -3.9 | -4.4 |
| -*U(IBP)* / J | 13155.55 | 13307.12 | 13636.52 | 12691.27 | 11608.29 | 12039.15 |
| *m’*·c*u*o(fuse) / J | 41.57 | 49.86 | 39.46 | 50.02 | 42.87 | 39.79 |
| -*U*(HNO3) / J | 22.98 | 23.16 | 23.88 | 21.91 | 20.48 | 22.09 |
| -*U*(ign) / J | 1.20 | 1.19 | 1.20 | 1.20 | 1.20 | 1.20 |
| -*U*(carbon) / J | 0.00 | 0.00 | 0.00 | 0.00 | 0.00 | 0.00 |
| *U∑ / J* | 8.92 | 9.04 | 9.27 | 8.59 | 7.80 | 8.11 |
| *Δcu0* (cpd.) */ J·g-1* | -26459.37 | -26454.61 | -26459.73 | -26464.93 | -26468.67 | -26469.26 |
| **<Δc*u*0> / J·g-1 = -26462.8 ± 2.4** | | | | | | |

**Table S5 – Calorimetric results for 3-amino-2-methylbenzoic acid.**

| **3-amino-2-methylbenzoic acid** | | | | | | | |
| --- | --- | --- | --- | --- | --- | --- | --- |
|  | **1** | **2** | **3** | **4** | **5** | **6** | **7** |
| *m*(cpd.)./ g | 0.49590 | 0.50666 | 0.49231 | 0.48554 | 0.47632 | 0.46526 | 0.51202 |
| *m’*(fuse) / g | 0.00291 | 0.00308 | 0.00315 | 0.00310 | 0.00301 | 0.00326 | 0.00259 |
| *T*i / ºC | 25.0008 | 25.0006 | 25.0004 | 25.0009 | 25.0013 | 25.0006 | 25.0013 |
| *T*f / ºC | 25.9347 | 25.9549 | 25.9299 | 25.9221 | 25.9033 | 25.8878 | 25.9446 |
| *T*ad / K | 0.84647 | 0.86607 | 0.84113 | 0.83246 | 0.81286 | 0.79824 | 0.87351 |
| **i (cont.) / JK-1 | 15.02 | 15.03 | 15.02 | 15.01 | 14.99 | 14.98 | 15.04 |
| **f (cont.) / JK-1 | 15.47 | 15.49 | 15.45 | 15.45 | 15.43 | 15.40 | 15.51 |
| *m (*H2O) / g | 0.9 | -3.0 | -0.4 | -12.7 | 2.5 | -13.8 | 2.0 |
| -*U(IBP)* / J | 13181.66 | 13472.72 | 13093.89 | 12916.05 | 12663.67 | 12381.49 | 13606.75 |
| *m’*·c*u*o(fuse) / J | 47.26 | 50.02 | 51.16 | 50.34 | 48.88 | 52.94 | 42.06 |
| -*U*(HNO3) / J | 24.24 | 24.24 | 24.66 | 23.28 | 22.81 | 22.92 | 23.58 |
| -*U*(ign) / J | 1.20 | 1.19 | 1.19 | 1.19 | 1.20 | 1.20 | 1.19 |
| -*U*(carbon) / J | 0.00 | 0.00 | 0.00 | 0.00 | 0.00 | 0.00 | 0.00 |
| *U∑ / J* | 8.95 | 9.17 | 8.89 | 8.76 | 8.58 | 8.37 | 9.26 |
| *Δcu0* (cpd.) */ J·g-1* | -26416.79 | -26424.00 | -26422.14 | -26429.31 | -26415.27 | -26428.07 | -26426.09 |
| **<Δc*u*0> / J·g-1 = -26423.1 ± 2.0** | | | | | | | |

Table S6 – Calorimetric results for 3-amino-4-methylbenzoic acid.

| **3-amino-4-methylbenzoic acid** | | | | | | |
| --- | --- | --- | --- | --- | --- | --- |
|  | **1** | **2** | **3** | **4** | **5** | **6** |
| *m*(cpd.)./ g | 0.46807 | 0.70984 | 0.54449 | 0.51391 | 0.57391 | 0.54852 |
| *m’*(fuse) / g | 0.00265 | 0.00328 | 0.00286 | 0.00299 | 0.00310 | 0.00302 |
| *T*i / ºC | 25.0011 | 25.0015 | 25.0004 | 25.0005 | 25.0008 | 25.0005 |
| *T*f / ºC | 25.9330 | 26.2855 | 26.0142 | 25.9653 | 26.0630 | 26.0229 |
| *T*ad / K | 0.79766 | 1.20811 | 0.92850 | 0.87705 | 0.97821 | 0.93535 |
| **i (cont.) / JK-1 | 14.98 | 15.29 | 15.08 | 15.04 | 15.12 | 15.09 |
| **f (cont.) / JK-1 | 15.40 | 15.96 | 15.58 | 15.51 | 15.64 | 15.57 |
| *m (*H2O) / g | 1.8 | 1.9 | -2.8 | -4.0 | -1.5 | -2.4 |
| -*U(IBP)* / J | 12424.48 | 18819.00 | 14444.80 | 13639.91 | 15223.46 | 14552.96 |
| *m’*·c*u*o(fuse) / J | 43.04 | 53.27 | 46.45 | 48.56 | 50.34 | 49.04 |
| -*U*(HNO3) / J | 22.94 | 32.20 | 26.09 | 24.84 | 27.82 | 28.18 |
| -*U*(ign) / J | 1.19 | 1.19 | 1.20 | 1.19 | 1.19 | 1.19 |
| -*U*(carbon) / J | 0.00 | 0.00 | 0.00 | 0.00 | 0.00 | 0.00 |
| *U∑ / J* | 8.42 | 13.20 | 9.90 | 9.30 | 10.47 | 9.97 |
| *Δcu0* (cpd.) */ J·g-1* | -26382.75 | -26370.89 | -26375.36 | -26378.21 | -26369.20 | -26369.95 |
| **<Δc*u*0> / J·g-1 = -26374.4 ± 2.2** | | | | | | |

Table S7 – Calorimetric results for 4-amino-3-methylbenzoic acid.

| **4-amino-3-methylbenzoic acid** | | | | | | |
| --- | --- | --- | --- | --- | --- | --- |
|  | **1** | **2** | **3** | **4** | **5** | **6** |
| *m*(cpd.)./ g | 0.52826 | 0.49499 | 0.56732 | 0.50386 | 0.56581 | 0.57090 |
| *m’*(fuse) / g | 0.00273 | 0.00263 | 0.00270 | 0.00291 | 0.00338 | 0.00259 |
| *T*i / ºC | 25.0006 | 25.0009 | 25.0009 | 25.0009 | 25.0085 | 25.0010 |
| *T*f / ºC | 25.9851 | 25.9270 | 26.0455 | 25.9426 | 26.0506 | 26.0560 |
| *T*ad / K | 0.89837 | 0.84119 | 0.96423 | 0.85744 | 0.96262 | 0.97020 |
| **i (cont.) / JK-1 | 15.06 | 15.02 | 15.11 | 15.03 | 15.11 | 15.12 |
| **f (cont.) / JK-1 | 15.54 | 15.49 | 15.66 | 15.50 | 15.65 | 15.66 |
| *m (*H2O) / g | 0.1 | 0.4 | -0.2 | -1.5 | 0.0 | -1.6 |
| -*U(IBP)* / J | 13986.97 | 13097.71 | 15011.19 | 13343.96 | 14986.94 | 15098.40 |
| *m’*·c*u*o(fuse) / J | 44.34 | 42.71 | 43.85 | 47.26 | 54.89 | 42.06 |
| -*U*(HNO3) / J | 25.31 | 21.25 | 24.00 | 22.92 | 24.89 | 24.84 |
| -*U*(ign) / J | 1.21 | 1.19 | 1.20 | 1.20 | 1.19 | 1.20 |
| -*U*(carbon) / J | 0.00 | 0.00 | 0.00 | 0.00 | 0.00  .00 | 0.00 |
| *U∑ / J* | 9.58 | 8.94 | 10.35 | 9.11 | 10.33 | 10.42 |
| *Δcu0* (cpd.) */ J·g-1* | -26325.16 | -26311.05 | -26319.94 | -26323.56 | -26326.32 | -26309.09 |
| **<Δc*u*0> / J·g-1 = -26319.2 ± 3.0** | | | | | | |

**Computational results**

Table S8 – NICS-scan values for the selected distances of the Bq atom from the centre of the averaged ring plane.

|  | **NICS (ppm)** | | | |
| --- | --- | --- | --- | --- |
| **Distance**a **/ Å** | Benzene | Aniline | Toluene | Benzoic acid |
| -2.0 | -4.84 | -4.02 | -4.60 | -4.85 |
| -1.8 | -5.84 | -4.89 | -5.56 | -5.87 |
| -1.6 | -6.98 | -5.91 | -6.66 | -7.03 |
| -1.4 | -8.20 | -7.01 | -7.83 | -8.27 |
| -1.2 | -9.35 | -8.07 | -8.94 | -9.44 |
| -1.0 | -10.22 | -8.92 | -9.79 | -10.32 |
| -0.8 | -10.57 | -9.36 | -10.16 | -10.65 |
| -0.6 | -10.25 | -9.26 | -9.90 | -10.30 |
| -0.4 | -9.39 | -8.72 | -9.13 | -9.40 |
| -0.2 | -8.45 | -8.09 | -8.29 | -8.44 |
| 0.0 | -8.04 | -7.83 | -7.95 | -8.02 |
| 0.2 | -8.45 | -8.15 | -8.36 | -8.44 |
| 0.4 | -9.39 | -8.83 | -9.24 | -9.40 |
| 0.6 | -10.25 | -9.40 | -10.03 | -10.30 |
| 0.8 | -10.57 | -9.51 | -10.30 | -10.65 |
| 1.0 | -10.22 | -9.07 | -9.93 | -10.32 |
| 1.2 | -9.35 | -8.21 | -9.07 | -9.44 |
| 1.4 | -8.20 | -7.14 | -7.96 | -8.27 |
| 1.6 | -6.98 | -6.04 | -6.78 | -7.03 |
| 1.8 | -5.84 | -5.02 | -5.68 | -5.87 |
| 2.0 | -4.84 | -4.13 | -4.71 | -4.85 |

a The negative values refer to the side of the ring plane for where the amino lone pair points to and the positive values to the side for where the amino hydrogen’s are oriented.

Table S8 – continued…

|  | **NICS (ppm)** | | | | |
| --- | --- | --- | --- | --- | --- |
| **Distance**a **/ Å** | 2a-3m-BA | 2a-4m-BA | 2a-5m-BA | 2a-6m-BA | 3a-2m-BA |
| -2.0 | -3.71 | -3.41 | -3.41 | -3.45 | -4.10 |
| -1.8 | -4.51 | -4.14 | -4.18 | -4.17 | -4.99 |
| -1.6 | -5.46 | -5.00 | -5.09 | -5.00 | -6.03 |
| -1.4 | -6.48 | -5.93 | -6.07 | -5.90 | -7.16 |
| -1.2 | -7.48 | -6.82 | -7.03 | -6.76 | -8.27 |
| -1.0 | -8.26 | -7.52 | -7.78 | -7.43 | -9.15 |
| -0.8 | -8.63 | -7.84 | -8.15 | -7.73 | -9.61 |
| -0.6 | -8.47 | -7.69 | -8.03 | -7.57 | -9.51 |
| -0.4 | -7.89 | -7.16 | -7.52 | -7.03 | -8.95 |
| -0.2 | -7.23 | -6.58 | -6.95 | -6.43 | -8.32 |
| 0.0 | -6.95 | -6.33 | -6.71 | -6.18 | -8.08 |
| 0.2 | -7.23 | -6.60 | -7.00 | -6.45 | -8.43 |
| 0.4 | -7.89 | -7.20 | -7.60 | -7.04 | -9.12 |
| 0.6 | -8.47 | -7.74 | -8.12 | -7.57 | -9.69 |
| 0.8 | -8.62 | -7.88 | -8.22 | -7.72 | -9.79 |
| 1.0 | -8.24 | -7.54 | -7.83 | -7.41 | -9.32 |
| 1.2 | -7.46 | -6.83 | -7.05 | -6.73 | -8.43 |
| 1.4 | -6.47 | -5.93 | -6.07 | -5.87 | -7.33 |
| 1.6 | -5.44 | -5.00 | -5.07 | -4.97 | -6.19 |
| 1.8 | -4.50 | -4.14 | -4.16 | -4.13 | -5.14 |
| 2.0 | -3.70 | -3.41 | -3.40 | -3.42 | -4.24 |

a The negative values refer to the side of the ring plane for where the amino lone pair points to and the positive values to the side for where the amino hydrogen’s are oriented.

Table S8 – continued…

|  | **NICS (ppm)** | | | | |
| --- | --- | --- | --- | --- | --- |
| **Distance**a **/ Å** | 3a-4m-BA | 3a-5m-BA | 3a-6m-BA | 4a-2m-BA | 4a-3m-BA |
| -2.0 | -3.94 | -3.82 | -3.99 | -3.74 | -3.94 |
| -1.8 | -4.83 | -4.67 | -4.89 | -4.54 | -4.88 |
| -1.6 | -5.87 | -5.66 | -5.94 | -5.47 | -5.99 |
| -1.4 | -7.02 | -6.73 | -7.09 | -6.47 | -7.20 |
| -1.2 | -8.15 | -7.77 | -8.20 | -7.44 | -8.37 |
| -1.0 | -9.05 | -8.60 | -9.10 | -8.20 | -9.28 |
| -0.8 | -9.52 | -9.03 | -9.58 | -8.58 | -9.68 |
| -0.6 | -9.42 | -8.94 | -9.50 | -8.47 | -9.46 |
| -0.4 | -8.84 | -8.44 | -8.97 | -7.95 | -8.74 |
| -0.2 | -8.17 | -7.87 | -8.35 | -7.36 | -7.96 |
| 0.0 | -7.89 | -7.68 | -8.10 | -7.13 | -7.61 |
| 0.2 | -8.22 | -8.03 | -8.42 | -7.44 | -7.94 |
| 0.4 | -8.92 | -8.71 | -9.10 | -8.09 | -8.73 |
| 0.6 | -9.52 | -9.24 | -9.67 | -8.64 | -9.47 |
| 0.8 | -9.61 | -9.30 | -9.76 | -8.74 | -9.73 |
| 1.0 | -9.13 | -8.82 | -9.29 | -8.33 | -9.35 |
| 1.2 | -8.21 | -7.94 | -8.39 | -7.54 | -8.46 |
| 1.4 | -7.08 | -6.85 | -7.27 | -6.55 | -7.30 |
| 1.6 | -5.92 | -5.75 | -6.12 | -5.53 | -6.09 |
| 1.8 | -4.87 | -4.74 | -5.06 | -4.60 | -4.98 |
| 2.0 | -3.98 | -3.89 | -4.15 | -3.80 | -4.03 |

a The negative values refer to the side of the ring plane for where the amino lone pair points to and the positive values to the side for where the amino hydrogen’s are oriented.

*S9 – Benzene (D6h)*

Table S9.1 – Optimized geometry (Cartesian coordinates)

C 0 0.000000 1.394302 0.000000

C 0 1.207501 0.697151 0.000000

C 0 1.207501 -0.697151 0.000000

C 0 0.000000 -1.394302 0.000000

C 0 -1.207501 -0.697151 0.000000

C 0 -1.207501 0.697151 0.000000

H 0 0.000000 2.478593 0.000000

H 0 2.146524 1.239296 0.000000

H 0 2.146524 -1.239296 0.000000

H 0 0.000000 -2.478593 0.000000

H 0 -2.146524 -1.239296 0.000000

H 0 -2.146524 1.239296 0.000000

Table S9.2 – Calculated energies, in Hartree

| E0 | E0 + ZPE | H (298.15 K) |
| --- | --- | --- |
| -232.3113000 | -232.2131796 | -232.2076724 |

Scaled factors ZPE (0.9804) and *H*corr (0.9613) *T* =298.15K *P*= 1bar

Figure S1 – NICS-scan plot for benzene

*S10 - Aniline*

Table S10.1 – Optimized geometry (Cartesian coordinates)

C 0 0.000000 0.000000 0.000000

C 0 0.000000 0.000000 1.391244

C 0 1.198169 0.000000 2.104854

C 0 2.401832 -0.000484 1.400547

C 0 2.412602 -0.000457 0.009355

C 0 1.209071 0.001317 -0.711576

N 0 1.214513 -0.055650 -2.108704

H 0 -0.940141 -0.005748 -0.542917

H 0 -0.946632 0.000686 1.920806

H 0 1.193974 0.000639 3.188208

H 0 3.344325 -0.000192 1.937451

H 0 3.356927 -0.006556 -0.526238

H 0 2.053713 0.282217 -2.556163

H 0 0.378965 0.282608 -2.562663

Table S10.2 – Calculated energies, in Hartree

| E0 | E0 + ZPE | H (298.15 K) |
| --- | --- | --- |
| -287.6877328 | -287.5734952 | -287.5664842 |

Scaled factors ZPE (0.9804) and *H*corr (0.9613) *T* =298.15K *P*= 1bar

Figure S2 – NICS-scan plot for aniline

*S11 - Toluene*

Table S11.1 – Optimized geometry (Cartesian coordinates)

C 0 0.000000 0.000000 0.000000

C 0 0.000000 0.000000 1.393771

C 0 1.204937 0.000000 2.094428

C 0 2.406914 -0.001693 1.388771

C 0 2.401101 -0.001683 -0.005016

C 0 1.199057 0.002401 -0.721428

C 0 1.195874 0.035726 -2.231221

H 0 -0.944217 -0.004187 -0.535744

H 0 -0.941527 -0.004013 1.932158

H 0 1.207203 -0.002962 3.178577

H 0 3.350692 -0.007038 1.923197

H 0 3.343063 -0.007202 -0.544704

H 0 2.080354 -0.456024 -2.643006

H 0 0.311554 -0.459315 -2.639379

H 0 1.193167 1.067252 -2.600539

Table S11.2 – Calculated energies, in Hartree

| E0 | E0 + ZPE | H (298.15 K) |
| --- | --- | --- |
| -271.6388674 | -271.5141201 | -271.5067201 |

Scaled factors ZPE (0.9804) and *H*corr (0.9613) *T* =298.15K *P*= 1bar

Figure S3 – NICS-scan plot for toluene

*S12 - Benzoic acid*

Table S12.1 – Optimized geometry (Cartesian coordinates)

C 0 0.000000 0.000000 0.000000

C 0 0.000000 0.000000 1.391825

C 0 1.206475 0.000000 2.091388

C 0 2.417941 0.000000 1.398653

C 0 2.423335 0.000000 0.008473

C 0 1.214283 0.000000 -0.696951

C 0 1.271780 0.000000 -2.182233

O 0 2.287322 0.000731 -2.838491

O 0 0.043137 -0.000948 -2.762017

H 0 -0.932495 0.000000 -0.548940

H 0 -0.940420 0.000000 1.930868

H 0 1.202947 0.000000 3.175748

H 0 3.355312 0.000000 1.942884

H 0 3.352162 0.000000 -0.548455

H 0 0.188049 -0.000823 -3.719447

Table S12.2 – Calculated energies, in Hartree

| E0 | E0 + ZPE | H (298.15 K) |
| --- | --- | --- |
| -420.9482584 | -420.8353508 | -420.8270278 |

Scaled factors ZPE (0.9804) and *H*corr (0.9613) *T* =298.15K *P*= 1bar

Figure S4 – NICS-scan plot for benzoic acid

*S13 - 2-amino-3-methylbenzoic acid*

Table S13.1 – Optimized geometry (Cartesian coordinates)

C 0 0.000000 0.000000 0.000000

C 0 0.000000 0.000000 1.385522

C 0 1.185553 0.000000 2.132493

C 0 2.394990 0.004340 1.467886

C 0 2.451393 0.008849 0.061025

C 0 1.242738 0.002254 -0.693588

C 0 3.749666 0.037953 -0.621096

O 0 3.929543 0.071332 -1.829919

O 0 4.815382 0.030719 0.222420

N 0 1.250727 -0.032953 -2.058595

C 0 -1.291037 -0.011613 -0.777954

H 0 -0.954464 -0.002863 1.902913

H 0 1.150986 -0.002720 3.214858

H 0 3.324520 0.007665 2.020702

H 0 5.603201 0.056018 -0.339460

H 0 0.400884 0.134529 -2.566954

H 0 2.138800 0.067806 -2.531696

H 0 -2.148430 -0.023318 -0.103825

H 0 -1.366453 -0.893172 -1.425397

H 0 -1.392533 0.873944 -1.417929

Table S13.2 – Calculated energies, in Hartree

| E0 | E0 + ZPE | H (298.15 K) |
| --- | --- | --- |
| -515.6586704 | -515.5029089 | -515.490935 |

Scaled factors ZPE (0.9804) and *H*corr (0.9613) *T* =298.15K *P*= 1bar

Figure S5 – NICS-scan plot for 2-amino-3-methylbenzoic acid

*S14 - 2-amino-4-methylbenzoic acid*

Table S14.1 – Optimized geometry (Cartesian coordinates)

C 0 0.000000 0.000000 0.000000

C 0 0.000000 0.000000 1.384203

C 0 1.232841 0.000000 2.068806

C 0 2.413749 0.004273 1.357410

C 0 2.432240 0.007394 -0.052009

C 0 1.194858 0.000302 -0.754919

C 0 3.699654 0.033646 -0.782398

O 0 3.828941 0.063914 -1.998081

O 0 4.799109 0.026706 0.018221

N 0 1.131241 -0.029505 -2.116372

C 0 -1.294501 -0.001613 2.157599

H 0 -0.944974 -0.005940 -0.535304

H 0 1.250020 -0.001431 3.152782

H 0 3.360840 0.008421 1.880526

H 0 5.563526 0.049676 -0.575020

H 0 0.245591 0.099877 -2.573855

H 0 1.988750 0.062568 -2.643378

H 0 -1.363216 0.878945 2.803801

H 0 -1.360281 -0.881748 2.804650

H 0 -2.160960 -0.003450 1.494016

Table S14.2 – Calculated energies, in Hartree

| E0 | E0 + ZPE | H (298.15 K) |
| --- | --- | --- |
| -515.6600664 | -515.5041988 | -515.4926298 |

Scaled factors ZPE (0.9804) and *H*corr (0.9613) *T* =298.15K *P*= 1bar

Figure S6 – NICS-scan plot for 2-amino-4-methylbenzoic acid

*S15 - 2-amino-5-methylbenzoic acid*

Table S15.1 – Optimized geometry (Cartesian coordinates)

C 0 0.000000 0.000000 0.000000

C 0 0.000000 0.000000 1.379459

C 0 1.195779 0.000000 2.123740

C 0 2.381917 -0.006028 1.411025

C 0 2.422486 -0.010604 0.000543

C 0 1.206562 -0.001570 -0.735368

C 0 3.708342 -0.043174 -0.702175

O 0 3.863165 -0.083088 -1.913954

O 0 4.790022 -0.031413 0.121582

N 0 1.169668 0.035050 -2.100246

C 0 1.169270 0.005345 3.633196

H 0 -0.940377 0.007186 -0.541835

H 0 -0.952091 0.001356 1.902172

H 0 3.325317 -0.011488 1.942004

H 0 5.566966 -0.060449 -0.454984

H 0 0.295607 -0.126235 -2.570301

H 0 2.035567 -0.083585 -2.607479

H 0 2.180506 -0.010750 4.044639

H 0 0.635719 -0.865461 4.027790

H 0 0.666624 0.897017 4.021988

Table S15.2 – Calculated energies, in Hartree

| E0 | E0 + ZPE | H (298.15 K) |
| --- | --- | --- |
| -515.6580783 | -515.5017406 | -515.4905636 |

Scaled factors ZPE (0.9804) and *H*corr (0.9613) *T* =298.15K *P*= 1bar

Figure S7 – NICS-scan plot for 2-amino-5-methylbenzoic acid

*S16 - 2-amino-6-methylbenzoic acid*

Table S16.1 – Optimized geometry (Cartesian coordinates)

C 0 0.000000 0.000000 0.000000

C 0 0.000000 0.000000 1.375374

C 0 1.203996 0.000000 2.086156

C 0 2.429304 -0.002122 1.430123

C 0 2.454929 -0.003479 0.000054

C 0 1.214068 -0.000629 -0.720878

C 0 3.695023 0.004427 -0.792554

O 0 3.762335 0.086752 -2.012672

O 0 4.850832 -0.093368 -0.086240

N 0 1.148014 -0.025003 -2.082377

C 0 3.663274 0.006181 2.305947

H 0 -0.933530 -0.002244 -0.552704

H 0 -0.942540 0.001835 1.912317

H 0 1.185589 0.004010 3.169109

H 0 5.558210 -0.070106 -0.747495

H 0 0.253726 0.089139 -2.527008

H 0 1.998854 0.081203 -2.616687

H 0 3.360886 0.039833 3.353593

H 0 4.303069 0.866543 2.103318

H 0 4.278030 -0.882043 2.151917

Table S16.2 – Calculated energies, in Hartree

| E0 | E0 + ZPE | H (298.15 K) |
| --- | --- | --- |
| -515.6513971 | -515.4952715 | -515.4837785 |

Scaled factors ZPE (0.9804) and *H*corr (0.9613) *T* =298.15K *P*= 1bar

Figure S8 – NICS-scan plot for 2-amino-6-methylbenzoic acid

*S17 - 3-amino-2-methylbenzoic acid*

Table S17.1 – Optimized geometry (Cartesian coordinates)

C 0 0.000000 0.000000 0.000000

C 0 0.000000 0.000000 1.400100

C 0 1.193347 0.000000 2.109228

C 0 2.402983 0.010201 1.429884

C 0 2.420081 0.027215 0.026029

C 0 1.219905 0.004686 -0.715409

C 0 3.746344 0.117635 -0.648861

O 0 3.965997 0.534232 -1.764623

O 0 4.766567 -0.307200 0.146337

N 0 -1.215303 -0.066692 -0.688414

C 0 1.147810 -0.057507 -2.221578

H 0 -0.947787 -0.004538 1.929798

H 0 1.177807 -0.001834 3.192965

H 0 3.337348 0.019186 1.972268

H 0 5.579461 -0.166185 -0.360578

H 0 -2.029387 0.177068 -0.144074

H 0 -1.234257 0.348463 -1.607519

H 0 2.112770 -0.253435 -2.675726

H 0 0.791214 0.892885 -2.640209

H 0 0.443281 -0.837084 -2.529246

Table S17.2 – Calculated energies, in Hartree

| E0 | E0 + ZPE | H (298.15 K) |
| --- | --- | --- |
| -515.6464021 | -515.4901204 | -515.478688 |

Scaled factors ZPE (0.9804) and *H*corr (0.9613) *T* =298.15K *P*= 1bar

Figure S9 – NICS-scan plot for 3-amino-2-methylbenzoic acid

*S18 - 3-amino-4-methylbenzoic acid*

Table S18.1 – Optimized geometry (Cartesian coordinates)

C 0 0.000000 0.000000 0.000000

C 0 0.000000 0.000000 1.413604

C 0 1.225254 0.000000 2.082211

C 0 2.438648 -0.006824 1.402174

C 0 2.429796 -0.011571 0.004130

C 0 1.216521 -0.006353 -0.686168

C 0 3.679391 -0.015912 -0.796816

O 0 3.734694 -0.010228 -2.006057

O 0 4.803725 -0.026407 -0.032756

N 0 -1.204672 -0.057547 -0.705458

C 0 -1.300668 -0.009147 2.172162

H 0 1.224378 0.001610 3.167361

H 0 3.375501 -0.008710 1.941725

H 0 1.235281 -0.010084 -1.770282

H 0 5.552463 -0.028350 -0.646548

H 0 -2.011216 0.346603 -0.254012

H 0 -1.146963 0.192321 -1.681670

H 0 -1.126403 -0.045060 3.248328

H 0 -1.914754 -0.874479 1.899223

H 0 -1.898070 0.888733 1.968237

Table S18.2 – Calculated energies, in Hartree

| E0 | E0 + ZPE | H (298.15 K) |
| --- | --- | --- |
| -515.6535369 | -515.4974480 | -515.485950 |

Scaled factors ZPE (0.9804) and *H*corr (0.9613) *T* =298.15K *P*= 1bar

Figure S10 – NICS-scan plot for 3-amino-4-methylbenzoic acid

*S19 - 3-amino-5-methylbenzoic acid*

Table S19.1 – Optimized geometry (Cartesian coordinates)

C 0 0.000000 0.000000 0.000000

C 0 0.000000 0.000000 1.402279

C 0 1.188374 0.000000 2.136023

C 0 2.405733 0.002482 1.453016

C 0 2.418981 0.002275 0.053338

C 0 1.227621 -0.000003 -0.670957

C 0 3.689201 0.010339 -0.719584

O 0 3.771090 0.021710 -1.926842

O 0 4.796022 0.003980 0.068897

N 0 -1.199049 -0.056843 -0.711715

C 0 1.146904 -0.017956 3.645877

H 0 -0.950615 -0.004721 1.929067

H 0 3.339318 0.007115 1.999403

H 0 1.271399 -0.002405 -1.753833

H 0 5.558282 0.009442 -0.528080

H 0 -2.016746 0.286339 -0.230336

H 0 -1.156506 0.254028 -1.670825

H 0 2.134815 0.168164 4.070872

H 0 0.802095 -0.988461 4.017432

H 0 0.462766 0.741437 4.034721

Table S19.2 – Calculated energies, in Hartree

| E0 | E0 + ZPE | H (298.15 K) |
| --- | --- | --- |
| -515.6528972 | -515.4972468 | -515.485432 |

Scaled factors ZPE (0.9804) and *H*corr (0.9613) *T* =298.15K *P*= 1bar

Figure S11 – NICS-scan plot for 3-amino-5-methylbenzoic acid

*S20 - 3-amino-6-methylbenzoic acid*

Table S20.1 – Optimized geometry (Cartesian coordinates)

C 0 0.000000 0.000000 0.000000

C 0 0.000000 0.000000 1.399250

C 0 1.167243 0.000000 2.151398

C 0 2.417823 0.003576 1.521123

C 0 2.444498 0.003822 0.125690

C 0 1.264667 0.002103 -0.631926

C 0 1.372754 0.003207 -2.114943

N 0 3.601126 -0.054703 2.263829

C 0 -1.320485 -0.000550 -0.731104

O 0 2.662745 0.025139 -2.557882

O 0 0.451963 -0.012873 -2.900774

H 0 -0.952784 -0.000540 1.917990

H 0 1.109345 -0.007098 3.235463

H 0 3.396052 0.000836 -0.390028

H 0 3.541639 0.297424 3.207942

H 0 4.430009 0.271495 1.788959

H 0 -2.140930 0.005748 -0.010180

H 0 -1.428204 -0.876641 -1.374052

H 0 -1.423924 0.868139 -1.384714

H 0 2.612978 0.019816 -3.524562

Table S20.2 – Calculated energies, in Hartree

| E0 | E0 + ZPE | H (298.15 K) |
| --- | --- | --- |
| -515.6482866 | -515.4922844 | -515.480737 |

Scaled factors ZPE (0.9804) and *H*corr (0.9613) *T* =298.15K *P*= 1bar

Figure S12 – NICS-scan plot for 3-amino-6-methylbenzoic acid

*S21 - 4-amino-2-methylbenzoic acid*

Table S21.1 – Optimized geometry (Cartesian coordinates)

C 0 0.000000 0.000000 0.000000

C 0 0.000000 0.000000 1.403541

C 0 1.233762 0.000000 2.073848

C 0 2.408122 0.002909 1.346301

C 0 2.412691 0.004371 -0.059795

C 0 1.173030 0.002678 -0.749463

C 0 3.697816 0.009848 -0.782837

O 0 3.854128 0.014308 -1.986474

O 0 4.781160 0.009658 0.051812

N 0 -1.190058 -0.049657 2.108034

C 0 1.058647 0.003849 -2.253933

H 0 -0.952340 -0.005594 -0.521537

H 0 1.262942 -0.005722 3.158303

H 0 3.354964 0.004770 1.869053

H 0 5.557879 0.012628 -0.525236

H 0 -1.167196 0.228668 3.076668

H 0 -2.029237 0.225548 1.622099

H 0 1.552282 -0.865870 -2.691725

H 0 1.547744 0.876658 -2.690688

H 0 0.007956 0.000962 -2.551039

Table S21.2 – Calculated energies, in Hartree

| E0 | E0 + ZPE | H (298.15 K) |
| --- | --- | --- |
| -515.6531944 | -515.4970534 | -515.485524 |

Scaled factors ZPE (0.9804) and *H*corr (0.9613) *T* =298.15K *P*= 1bar

Figure S13 – NICS-scan plot for 4-amino-2-methylbenzoic acid

*S22 - 4-amino-3-methylbenzoic acid*

Table S22.1 – Optimized geometry (Cartesian coordinates)

C 0 0.000000 0.000000 0.000000

C 0 0.000000 0.000000 1.384340

C 0 1.205779 0.000000 2.106068

C 0 2.437972 -0.003428 1.408452

C 0 2.411821 -0.000910 0.020981

C 0 1.211516 0.001160 -0.702462

C 0 1.277241 0.005061 -2.175343

O 0 2.293624 0.007859 -2.836186

O 0 0.048714 0.005607 -2.767449

N 0 1.185845 -0.049558 3.490838

C 0 3.741943 -0.017067 2.164976

H 0 -0.936610 0.001400 -0.541878

H 0 -0.941141 -0.002612 1.925054

H 0 3.343124 -0.001859 -0.533894

H 0 0.208383 0.007740 -3.722038

H 0 2.006154 0.263610 3.984920

H 0 0.319398 0.194576 3.944690

H 0 3.818748 -0.892054 2.820240

H 0 3.860369 0.874301 2.794281

H 0 4.588046 -0.040941 1.477309

Table S22.2 – Calculated energies, in Hartree

| E0 | E0 + ZPE | H (298.15 K) |
| --- | --- | --- |
| -515.6562905 | -515.4999259 | -515.488428 |

Scaled factors ZPE (0.9804) and *H*corr (0.9613) *T* =298.15K *P*= 1bar

Figure S14 – NICS-scan plot for 4-amino-3-methylbenzoic acid
